# Supplementary material
Source: HighWire-hosted journal article supplement (https://erj.ersjournals.com/content/55/4/1901952)
Supplement: inline-supplementary-material-1 [file inline-supplementary-material-1.pdf]

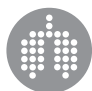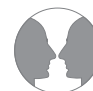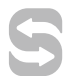

SHAREABLE PDF

# Prolidase deficiency: a new genetic cause of combined pulmonary fibrosis and emphysema syndrome in the adult

Vincent Cottin <sup>1</sup>, Mouhamad Nasser <sup>1</sup>, Julie Traclet<sup>1</sup>, Lara Chalabreysse<sup>2</sup>, Anne-Sophie Lèbre <sup>3</sup>, Salim Si-Mohamed<sup>4</sup>, François Philit<sup>5</sup> and Françoise Thivolet-Béjui<sup>2</sup>

**Affiliations:** <sup>1</sup>National Coordinating Reference Centre for Rare Pulmonary Diseases, Louis Pradel Hospital, Hospices Civils de Lyon, UMR 754, Claude Bernard University Lyon 1, member of OrphaLung, RespiFil, and ERN-LUNG, Lyon, France. <sup>2</sup>Dept of Pathology, Groupement Hospitalier Est, Hospices Civils de Lyon, Claude Bernard University Lyon 1, Lyon, France. <sup>3</sup>CHU Reims, Hôpital Maison Blanche, Pôle de Biologie, Service de Génétique, Reims, France. <sup>4</sup>Dept of Radiology, Louis Pradel Hospital, Hospices Civils de Lyon, Lyon, France. <sup>5</sup>Dept of Respiratory Medicine, Croix Rousse Hospital, Hospices Civils de Lyon, Lyon, France.

**Correspondence:** Vincent Cottin, Service de Pneumologie, Hôpital Louis Pradel, 28 avenue Doyen Lepine, F-69677 Lyon Cedex, France. E-mail: [vincent.cottin@chu-lyon.fr](mailto:vincent.cottin@chu-lyon.fr)

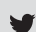

@ERSpublications

**Prolidase deficiency is a new genetic cause of combined pulmonary fibrosis and emphysema syndrome in the adult** <http://bit.ly/2QRgqMH>

**Cite this article as:** Cottin V, Nasser M, Traclet J, *et al.* Prolidase deficiency: a new genetic cause of combined pulmonary fibrosis and emphysema syndrome in the adult. *Eur Respir J* 2020; 55: 1901952 [<https://doi.org/10.1183/13993003.01952-2019>].

This single-page version can be shared freely online.

## To the Editor:

Pulmonary fibrosis is considered to result from recurrent alveolar epithelial injury coupled with dysfunctional alveolar wound healing mechanisms, some of which have a genetic background. Pulmonary fibrosis in the adult has not been previously associated with prolidase deficiency, an innate deficiency of amino acid metabolism.
